# Supplementary material
Source: PubMed Central journal article supplement (PMC9050539)
Supplement: awab368_supplementary_data.pdf [file awab368_supplementary_data.pdf]

**Supplementary Table 1. Regions of Interest used in Neuropathologic Evaluation and Analysis**

| Region                                        | TDP-C | H&E |
|-----------------------------------------------|-------|-----|
| <b>Cortical</b>                               |       |     |
| Anterior cingulate cortex (ACC)               |       | X   |
| Entorhinal cortex (ERC)                       | X     | X   |
| Left and right inferior frontal gyrus (IFG)   | X     | X   |
| Left and right inferior parietal lobule (IPL) | X     | X   |
| Insula                                        | X     | X   |
| Left and right middle frontal gyrus (MFG)     | X     | X   |
| Left motor cortex                             | X     | X   |
| Occipital cortex                              | X     | X   |
| Posterior cingulate cortex (PCC)              |       | X   |
| Left somatosensory cortex                     | X     | X   |
| Left and right superior temporal gyrus (STG)  | X     | X   |
| Left and right temporal poles                 | X     | X   |
| Transentorhinal cortex                        | X     | X   |
| <b>Subcortical</b>                            |       |     |
| Amygdala                                      | X     | X   |
| Basis pontis (PONS)                           |       | X   |
| CA1                                           | X     | X   |
| CA2-4                                         | X     | X   |
| Caudate                                       | X     | X   |
| Cerebral peduncle                             | X     | X   |
| Clastrum                                      | X     | X   |
| Dentate gyrus (dentate)                       | X     | X   |
| Globus pallidus                               | X     | X   |
| Inferior olive                                | X     | X   |
| Internal capsule                              |       | X   |
| Locus coeruleus                               |       | X   |
| Mammillary body                               |       | X   |
| Nucleus ambiguus                              | X     | X   |
| Nucleus basalis of Meynert (nbM)              | X     | X   |
| Periaqueductal gray                           | X     | X   |
| Purkinje layer of the cerebellum (CBL)        |       | X   |
| Pyramis                                       | X     | X   |
| Putamen                                       | X     | X   |
| Subiculum                                     | X     | X   |
| Substantia nigra                              | X     | X   |
| Subthalamus                                   | X     | X   |
| Tegmentum                                     | X     | X   |
| Thalamus                                      | X     | X   |

35 distinct cortical and subcortical regions were used to analyze TDP-C distribution, and 42 regions were used to analyze NL/G through H&E staining. Table indicates whether bilateral cortical sections were available.

**Supplementary Table 2. Mean and Median TDP-C and NL/G Scores of Regions in High and Low Neuronal Dropout Groups**

| Region                                      | Group |               | NCIs | Short<br>DNs | Long<br>DNs | NL/G |
|---------------------------------------------|-------|---------------|------|--------------|-------------|------|
| Temporal Poles (TP)                         | High  | <i>Median</i> | 1.75 | 3            | 2.5         | 4    |
|                                             |       | <i>Mean</i>   | 1.83 | 3.19         | 2.58        | 3.94 |
| Amygdala                                    | High  | <i>Median</i> | 2    | 4            | 2           | 4    |
|                                             |       | <i>Mean</i>   | 2.4  | 3.6          | 2.1         | 3.9  |
| Transenotrhinal &<br>Entorhinal (Trans/ERC) | High  | <i>Median</i> | 1.5  | 3            | 1.75        | 3.5  |
|                                             |       | <i>Mean</i>   | 1.46 | 3.03         | 1.65        | 3.65 |
| Inferior Frontal Gyri (IFGs)                | Low   | <i>Median</i> | 2    | 2.63         | 3           | 2    |
|                                             |       | <i>Mean</i>   | 1.83 | 2.58         | 3.15        | 1.88 |
| Somatosensory                               | Low   | <i>Median</i> | 1.5  | 2.5          | 2.5         | 0    |
|                                             |       | <i>Mean</i>   | 1.67 | 2.89         | 2.39        | 0.5  |
| Occipital                                   | Low   | <i>Median</i> | 0.5  | 2            | 1.5         | 0    |
|                                             |       | <i>Mean</i>   | 0.56 | 2            | 1.33        | 0    |

“High” refers to the high neuronal dropout group (amygdala, bilateral temporal pole, trans/ERC), and “low” refers to the low neuronal dropout group (bilateral IFG, somatosensory, occipital). Median TDP-C scores of the six regions are fairly comparable across the 3 pathologic inclusions (NCIs, Short DNs, Long DNs); however, median NL/G scores differ greatly between high and low groups.

**Supplementary Table 3. Spearman Correlations between TDP-C and NL/G Scores in Regions in High and Low Neuronal Dropout Groups**

| <b>Group</b> | <b>NCIs</b>                    | <b>Short DNs</b>               | <b>Long DNs</b>                |
|--------------|--------------------------------|--------------------------------|--------------------------------|
| High         | $r = 0.2378$<br>( $p=0.2524$ ) | $r = -0.3398$<br>( $p=0.096$ ) | $r = -0.016$<br>( $p=0.937$ )  |
| Low          | $r = 0.5258$<br>( $p=0.0083$ ) | $r = 0.4963$<br>( $p=0.0136$ ) | $r = 0.6613$<br>( $p=0.0004$ ) |

“High” refers to the high neuronal dropout group (amygdala, bilateral temporal pole, trans/ERC), and “low” refers to the low neuronal dropout group (bilateral IFG, somatosensory, occipital).
